# Supplementary material for: Environmental Assessment of Hellisheidi Geothermal Power Plant based on Exergy Allocation Factors for Heat and Electricity Production
Source: MDPI journal article supplement (doi:10.3390/en16093616), 2023-04-22
Supplement: s1 [file s1]

# Supplementary Materials

## Environmental Assessment of Hellisheidi Geothermal Power Plant based on Exergy Allocation Factors for Heat and Electricity Production

Maryori Díaz-Ramírez<sup>1,2\*</sup>, Snorri Jokull<sup>3</sup>, Claudio Zuffi<sup>4</sup>, María Dolores Mainar-Toledo<sup>1</sup>,  
Giampaolo Manfrida<sup>4</sup>

<sup>1</sup>Research Centre for Energy Resources and Consumption (CIRCE), 50018 Zaragoza, Spain

<sup>2</sup>Instituto Universitario de Investigación CIRCE, Fundación CIRCE, Universidad de Zaragoza, 50009 Zaragoza, Spain

<sup>3</sup>Reykjavik Energy, Bæjarháls 1, 110 Reykjavík, Iceland

<sup>4</sup>Department of Industrial Engineering, University of Florence, 50134 Firenze FI, Italy

\*corresponding author. E-mail: mdiaz@fcirce.es Phone: +34 976 976 859 / Ext. 876 638 262

## INDEX

|                                                                              |   |
|------------------------------------------------------------------------------|---|
| GEOTHERMAL WELL PARAMETERS .....                                             | 2 |
| LCA OF HELLISHEIDI POWER PLANT .....                                         | 2 |
| LCI FOR THE CONSTRUCTION STAGE OF HELLISHEIDI POWER PLANT .....              | 3 |
| LCI FOR THE OPERATION AND MAINTENANCE STAGE OF HELLISHEIDI POWER PLANT ..... | 8 |
| LCI FOR THE END-OF-LIFE STAGE OF HELLISHEIDI POWER PLANT .....               | 9 |

## GEOTHERMAL WELL PARAMETERS

**Table S1. Main well parameters**

| Stage                                  | Parameters                            | Number of wells | Meters drilled, average depth | Meters drilled, total depth |
|----------------------------------------|---------------------------------------|-----------------|-------------------------------|-----------------------------|
| <b>Construction</b>                    | <i><b>Total Production wells</b></i>  | 54              | ---                           | ---                         |
|                                        | Narrow - Diesel                       | 16              | 2346                          | 37191                       |
|                                        | Narrow - Electricity                  | 0               | ---                           | ---                         |
|                                        | <i><b>Total Narrow wells</b></i>      | 16              | ---                           | ---                         |
|                                        | Wide - Diesel                         | 38              | 2247                          | 85947                       |
|                                        | Wide - Electricity                    | 0               | ---                           | ---                         |
|                                        | <i><b>Total Wide wells</b></i>        | 38              | ---                           | ---                         |
|                                        | <i><b>Total Reinjection wells</b></i> | 17              | ---                           | 1968                        |
|                                        | <b>Total wells in construction</b>    | 71              | ---                           | 123138                      |
| <b>Maintenance<br/>(Make-up wells)</b> | Narrow - Diesel                       | 1               | 2346                          | 2531                        |
|                                        | Narrow - Electricity                  | 1               | 2346                          | 2497                        |
|                                        | <i><b>Total Narrow wells</b></i>      | 2               | ---                           | ---                         |
|                                        | Wide - Diesel                         | 0               | ---                           | ---                         |
|                                        | Wide - Electricity                    | 28              | 2247                          | 62342                       |
|                                        | <i><b>Total Wide wells</b></i>        | 28              | ---                           | ---                         |
|                                        | <b>Total wells in maintenance</b>     | 30              | ---                           | ---                         |

## LCA OF HELLISHEIDI POWER PLANT

In this section are included the stages evaluated and referred to 1kWe and 1kWt.

**Table S2. Inventory related to Hellisheidi power plant (1kWe or 1kWt)**

| Process stage                                               | Subprocess                                              | Amount                                                         |
|-------------------------------------------------------------|---------------------------------------------------------|----------------------------------------------------------------|
| <b>Construction</b>                                         | Geothermal wells - Construction                         | (1/Net electricity or heat in 30 years)*Exergy Alloc.(E or H)  |
|                                                             | Wellhead equipment - Construction                       | (1/Net electricity or heat in 30 years)*Exergy Alloc.(E or H)  |
|                                                             | Collection pipelines - Construction                     | (1/Net electricity or heat in 30 years)*Exergy Alloc.(E or H)  |
|                                                             | Extraction site-Land use - Construction                 | (1/Net electricity or heat in 30 years)*Exergy Alloc.(E or H)  |
|                                                             | Power plant or heating station buildings - Construction | (1/Net electricity or heat in 30 years)                        |
|                                                             | Mechanical equipment - Construction                     | (1/Net electricity or heat in 30 years)                        |
|                                                             | Abatement (only steel) - Construction                   | (1/Net electricity or heat in 30 years)*Exergy Alloc.(E or H)  |
| <b>Operation, maintenance and abatement (O&amp;M&amp;A)</b> | Geothermal fluid - Operation                            | (1/Net electricity or heat in 30 years)*Exergy Alloc.(E or H)  |
|                                                             | Abatement (only emissions) - Operation                  | (1/Net electricity or heat in 30 years)* Exergy Alloc.(E or H) |
|                                                             | Chemicals - Maintenance                                 | (1/Net electricity or heat in 30 years)                        |
|                                                             | Geothermal wells - Maintenance                          | (1/Net electricity or heat in 30 years)* Exergy Alloc.(E or H) |
|                                                             | Wellhead equipment - Maintenance                        | (1/Net electricity or heat in 30 years)* Exergy Alloc.(E or H) |
|                                                             | Collection pipelines - Maintenance                      | (1/Net electricity or heat in 30 years)* Exergy Alloc.(E or H) |
|                                                             | Extraction site-Land use - Maintenance                  | (1/Net electricity or heat in 30 years)* Exergy Alloc.(E or H) |
| <b>End-of-Life</b>                                          | Wells closure of the geothermal plant (dismantling).    | (1/Net electricity or heat in 30 years)*Exergy Alloc.(E or H)  |

# LCI FOR THE CONSTRUCTION STAGE OF HELLISHEIDI POWER PLANT

**Table S3. Inventory related to geothermal wells (construction)**

| Construction-Geothermal wells   | Ecoinvent 3.6                                                                      | Amount     | Unit |
|---------------------------------|------------------------------------------------------------------------------------|------------|------|
| Steel (for well casing)         | Steel, low-alloyed {GLO}  market for   APOS, U                                     | 12171910.2 | kg   |
| Portland cement (Pre drilling)  | Cement, Portland {Europe without Switzerland}  market for   APOS, U                | 654000     | kg   |
| Portland cement (Well casing)   | Cement, Portland {Europe without Switzerland}  market for   APOS, U                | 5130409.9  | kg   |
| Silica flour (Well casing)      | Sand, quartz                                                                       | 2052164.6  | kg   |
| Wyoming bentonite (Well casing) | Bentonite {GLO}  market for   APOS, U                                              | 102605.8   | kg   |
| Perlite (Well casing)           | Perlite {GLO}  market for   APOS, U                                                | 102605.8   | kg   |
| Retardant (drilling)            | Bitumen seal, polymer EP4 flame retardant {GLO}  market for   APOS, U              | 9391       | kg   |
| Water binder (drilling)         | Acrylic binder, without water, in 34% solution state {GLO}  market for   APOS, U   | 23165      | kg   |
| Water (from ground, drilling)   | Water, groundwater consumption                                                     | 4171377.2  | kg   |
| Drill Soap (drilling)           | Foaming agent {GLO}  market for   APOS, U                                          | 74429.99   | kg   |
| Bentonite Clay (drilling)       | Bentonite {GLO}  market for   APOS, U                                              | 4147475    | kg   |
| Caustic soda (drilling)         | Sodium hydroxide, without water, in 50% solution state {GLO}  market for   APOS, U | 198165.97  | kg   |

**Table S4. Inventory related to wellhead equipment (construction)**

| Construction-Wellhead equipment | Ecoinvent 3.6                                            | Amount  | Unit           |
|---------------------------------|----------------------------------------------------------|---------|----------------|
| Excavation                      | Excavation, hydraulic digger {GLO}  market for   APOS, U | 213000  | m <sup>3</sup> |
| Fill                            | Excavation, hydraulic digger {GLO}  market for   APOS, U | 71000   | m <sup>3</sup> |
| Concrete                        | Concrete, normal {GLO}  market for   APOS, U             | 3067200 | kg             |
| Steel                           | Steel, low-alloyed {GLO}  market for   APOS, U           | 1034754 | kg             |
| Stainless steel                 | Steel, chromium steel 18/8 {GLO}  market for   APOS, U   | 1136    | kg             |
| Aluminium                       | Aluminium, primary, ingot {RoW}  market for   APOS, U    | 86478   | kg             |

**Table S5. Inventory related to collection pipeline (construction)**

| Construction-Collection pipeline | Ecoinvent 3.6                                            | Amount   | Unit           |
|----------------------------------|----------------------------------------------------------|----------|----------------|
| Excavation                       | Excavation, hydraulic digger {GLO}  market for   APOS, U | 648000   | m <sup>3</sup> |
| Fill                             | Excavation, hydraulic digger {GLO}  market for   APOS, U | 298800   | m <sup>3</sup> |
| Concrete                         | Concrete, normal {GLO}  market for   APOS, U             | 25920000 | m <sup>3</sup> |
| Steel                            | Steel, low-alloyed {GLO}  market for   APOS, U           | 7092000  | kg             |
| Aluminium                        | Aluminium, primary, ingot {RoW}  market for   APOS, U    | 223200   | kg             |

|          |                                       |         |    |
|----------|---------------------------------------|---------|----|
| Rockwool | Rock wool {GLO}  market for   APOS, U | 1548000 | kg |
|----------|---------------------------------------|---------|----|

**Table S6. Inventory related to extraction site-land use (construction)**

| Construction-Extraction site-Land use | Ecoinvent 3.6                                      | Amount | Unit           |
|---------------------------------------|----------------------------------------------------|--------|----------------|
| Land use for drilling operations      | Area of land occupied by extraction site           | 1065   | m <sup>2</sup> |
| Land use for drilling operations      | Area of Transformation, from forest                | 6390   | m <sup>2</sup> |
| Land use for drilling operations      | Area of Transformation, to mineral extraction site | 6390   | m <sup>2</sup> |
| Land use for drilling operations      | Water, well, in ground                             | 237140 | kg             |

**Table S7. Inventory related to power plant buildings (construction)**

| Construction-Power plant buildings | Ecoinvent 3.6                                                     | Amount   | Unit           |
|------------------------------------|-------------------------------------------------------------------|----------|----------------|
| Excavation                         | Excavation, hydraulic digger {GLO}  market for   APOS, U          | 647208   | m <sup>3</sup> |
| Filling                            | Excavation, hydraulic digger {GLO}  market for   APOS, U          | 740229   | m <sup>3</sup> |
| Concrete                           | Concrete, 40MPa {RoW}  market for concrete, 40MPa   APOS, U       | 66175200 | kg             |
| Steel                              | Steel, low-alloyed {GLO}  market for   APOS, U                    | 3956271  | kg             |
| Stainless steel                    | Steel, chromium steel 18/8 {GLO}  market for   APOS, U            | 223614   | kg             |
| Aluminium                          | Aluminium, cast alloy {GLO}  market for   APOS, U                 | 174831   | kg             |
| Copper                             | Copper {GLO}  market for   APOS, U                                | 45450    | kg             |
| Rockwool                           | Stone wool {GLO}  market for stone wool   APOS, U                 | 179982   | kg             |
| Plastic                            | Polyethylene, high density, granulate {GLO}  market for   APOS, U | 220887   | kg             |
| Asphalt                            | Mastic asphalt {GLO}  market for   APOS, U                        | 10940724 | kg             |

**Table S8. Inventory related to heating station buildings (construction)**

| Construction-Heating station buildings | Ecoinvent 3.6                                            | Amount  | Unit           |
|----------------------------------------|----------------------------------------------------------|---------|----------------|
| Excavation                             | Excavation, hydraulic digger {GLO}  market for   APOS, U | 102011  | m <sup>3</sup> |
| Fill                                   | Excavation, hydraulic digger {GLO}  market for   APOS, U | 74879   | m <sup>3</sup> |
| Concrete                               | Concrete, normal {GLO}  market for   APOS, U             | 7980000 | kg             |
| Steel                                  | Steel, low-alloyed {GLO}  market for   APOS, U           | 2933714 | kg             |
| Stainless steel                        | Steel, chromium steel 18/8 {GLO}  market for   APOS, U   | 33516   | kg             |
| Aluminium                              | Aluminium, primary, ingot {RoW}  market for   APOS, U    | 39102   | kg             |
| Copper                                 | Copper {GLO}  market for   APOS, U                       | 8778    | kg             |
| Mineral wool                           | Rock wool {GLO}  market for   APOS, U                    | 33117   | kg             |
| Asphalt                                | Mastic asphalt {GLO}  market for   APOS, U               | 235410  | kg             |

**Table S9. Inventory related to mechanical equipment for electricity (construction)**

| <b>Equipment</b>                       | <b>Amount</b>      |
|----------------------------------------|--------------------|
| Power HP_HPS - Steam separators        | 1                  |
| Power HP_HPM - Moisture removers       | 1                  |
| Power HP_HPTG - Turbine generator_45MW | 1                  |
| Power HP_CT - Cooling tower            | 1                  |
| Power HP_Pump1                         | 1                  |
| Power HP_Pump2                         | 1                  |
| Power LP_LPS - Steam separators        | 1                  |
| Power LP_LPM - Moisture removers       | 1                  |
| Power LP_LPTG - Turbine generator      | 1                  |
| Power LP_LPC - Condenser               | 1                  |
| Power LP_CT - Cooling tower            | 1                  |
| Power LP_Pump3                         | 1                  |
| Power LP_Pump4                         | 1                  |
| Power HP_HPC – Condenser PwP           | 1*Exergy_Alloc.(E) |

**Table S10. Inventory related to mechanical equipment for heating (construction)**

| <b>Equipment</b>                                         | <b>Amount</b>      |
|----------------------------------------------------------|--------------------|
| Heating_HWST - District Heating Water Tank, DHT          | 1                  |
| Heating_HWP - Hot water pump                             | 1                  |
| Heating_ET - electrical transformer                      | 1                  |
| Heating_DHHX - Heat exchanger for district heating water | 1                  |
| Heating_DA - Deaerator                                   | 1                  |
| Heating_CWST - Cold Water Tank, CWT                      | 1                  |
| Heating_CWP - Cold water pump                            | 1                  |
| Power HP_HPC – Condenser DH                              | 1*Exergy_Alloc.(H) |

**Table 11. Inventory related to mechanical equipment for electricity production\_High Pressure (construction)**

| Material        | Ecoinvent 3.6                                                                            | HP_HPS   | HP_HPM   | HP_HPTG    | HP_CT     | HP_Pump1 | HP_Pump2 | HP_HPC    |
|-----------------|------------------------------------------------------------------------------------------|----------|----------|------------|-----------|----------|----------|-----------|
| Steel           | Steel, low-alloyed {GLO}  market for   APOS, U                                           |          |          | 2182829.24 | 241650.44 |          |          |           |
| Stainless steel | Steel, chromium steel 18/8 {GLO}  market for   APOS, U                                   | 57799.15 | 33028.09 | 3686.54    | 44680.81  | 23.85    | 644.21   | 393229.88 |
| Aluminium       | Aluminium, cast alloy {GLO}  market for   APOS, U                                        |          |          | 68850.00   |           |          |          |           |
| Copper          | Copper {GLO}  market for   APOS, U                                                       |          |          | 77014.23   | 18520.09  | 179.33   | 4844.59  |           |
| Titanium        | Titanium dioxide {RER}  market for   APOS, U                                             |          |          |            |           |          |          | 140895.00 |
| Mineral wool    | Stone wool {GLO}  market for stone wool   APOS, U                                        | 45400.86 | 25943.35 |            |           |          |          |           |
| Plastic         | Polyethylene, high density, granulate {GLO}  market for   APOS, U                        |          |          |            | 2337.43   |          |          |           |
| GRP             | Glass fibre reinforced plastic, polyamide, injection moulded {GLO}  market for   APOS, U |          |          |            | 556308    |          |          |           |
| Transformer oil | Lubricating oil {RER}  market for lubricating oil   APOS, U                              |          |          | 184410     |           |          |          |           |

**Table 12. Inventory related to mechanical equipment for electricity production\_Low Pressure (construction)**

| Material        | Ecoinvent 3.6                                                                            | LP_LPS  | LP_LPM   | LP_LPTG   | LP_LPC   | LP_CT    | LP_Pump3 | LP_Pump4 |
|-----------------|------------------------------------------------------------------------------------------|---------|----------|-----------|----------|----------|----------|----------|
| Steel           | Steel, low-alloyed {GLO}  market for   APOS, U                                           |         |          | 266790.24 |          | 40275.07 |          |          |
| Stainless steel | Steel, chromium steel 18/8 {GLO}  market for   APOS, U                                   | 5504.68 | 33028.09 | 450.58    | 60863.33 | 7446.80  | 3.69     | 152.32   |
| Aluminium       | Aluminium, cast alloy {GLO}  market for   APOS, U                                        |         |          | 8415.00   |          |          |          |          |
| Copper          | Copper {GLO}  market for   APOS, U                                                       |         |          | 9412.85   |          | 3086.68  | 27.77    | 1145.46  |
| Titanium        | Titanium dioxide {RER}  market for   APOS, U                                             |         |          |           |          |          |          |          |
| Mineral wool    | Stone wool {GLO}  market for stone wool   APOS, U                                        | 4323.89 | 4323.89  |           |          |          |          |          |
| Plastic         | Polyethylene, high density, granulate {GLO}  market for   APOS, U                        |         |          |           |          | 389.57   |          |          |
| GRP             | Glass fibre reinforced plastic, polyamide, injection moulded {GLO}  market for   APOS, U |         |          |           |          | 92718.00 |          |          |
| Transformer oil | Lubricating oil {RER}  market for lubricating oil   APOS, U                              |         |          | 22539.00  |          |          |          |          |

**Table 13. Inventory related to mechanical equipment for heating (construction)**

| <b>Material</b> | <b>Ecoinvent 3.6</b>                                              | <b>HWST</b> | <b>HWP</b> | <b>ET</b> | <b>DHHX</b> | <b>DA</b> | <b>CWST</b> | <b>CWP</b> |
|-----------------|-------------------------------------------------------------------|-------------|------------|-----------|-------------|-----------|-------------|------------|
| Steel           | Steel, low-alloyed {GLO}  market for   APOS, U                    |             | 9448.32    | 9448.32   | 0           | 5107.2    |             | 1532.16    |
| Stainless steel | Steel, chromium steel 18/8 {GLO}  market for   APOS, U            | 120         | 0          | 0         | 79959.6     | 21100.45  | 240         | 9994.95    |
| Aluminium       | Aluminium, cast alloy {GLO}  market for   APOS, U                 |             | 0          | 0         | 688.94      | 242.06    |             | 0          |
| Copper          | Copper {GLO}  market for   APOS, U                                |             | 46.47      | 0         | 744         | 0         |             | 7.53       |
| Titanium        | Titanium dioxide {RER}  market for   APOS, U                      |             | 0          | 0         | 3630.9      | 1024.1    |             | 0          |
| Mineral wool    | Stone wool {GLO}  market for stone wool   APOS, U                 |             |            |           |             |           |             |            |
| Plastic         | Polyethylene, high density, granulate {GLO}  market for   APOS, U | 44.33       | 0          | 0         | 0           | 0         | 101.97      | 0          |

**Table 14. Inventory related to Abatement unit during electricity and heating production (Construction)**

| Material | Ecoinvent 3.6                                  | Amount  | Unit |
|----------|------------------------------------------------|---------|------|
| Steel    | Steel, low-alloyed {GLO}  market for   APOS, U | 13907.7 | kg   |

## LCI FOR THE OPERATION AND MAINTENANCE STAGE OF HELLISHEIDI POWER PLANT

In this stage, inputs and outputs related to the geothermal fluid are included per 1kg of geothermal fluid. The total amount of geothermal fluid in 30 years of operation is 9.93E11 kg.

**Table 15. Inventory related to Geothermal fluid (Operation)**

| O&M-Geothermal fluid | Ecoinvent 3.6                    | Amount | Unit                    |
|----------------------|----------------------------------|--------|-------------------------|
| <b>Inputs</b>        |                                  |        |                         |
| <i>Resources</i>     |                                  |        |                         |
| Water                | Water, process, well (in ground) | 0.09   | g/kg Geothermal fluid   |
| Energy               | Energy, geothermal               | 1.41E3 | kJ/ kg Geothermal fluid |
| <b>Outputs</b>       |                                  |        |                         |
| <i>Emissions</i>     |                                  |        |                         |
| CO <sub>2</sub>      | Carbon dioxide                   | 1.4    | g/kg Geothermal fluid   |
| H <sub>2</sub> S     | Hydrogen sulfide                 | 0.36   | g/kg Geothermal fluid   |
| H <sub>2</sub>       | Hydrogen                         | 1.5E-2 | g/kg Geothermal fluid   |
| CH <sub>4</sub>      | Methane                          | 2.1E-3 | g/kg Geothermal fluid   |
| Heat                 | Heat, waste                      | 1110   | kJ/ kg Geothermal fluid |

**Table 16. Inventory related to substances for electricity and heating production (Operation)**

| O&M-substances          | Ecoinvent 3.6                                                                                                                                   | Amount      | Unit |
|-------------------------|-------------------------------------------------------------------------------------------------------------------------------------------------|-------------|------|
| Groundwater (P)         | Water, well, Europe without Switzerland                                                                                                         | 2.83824E+11 | kg   |
| Groundwater (H)         | Water, well, Europe without Switzerland                                                                                                         | 4.12964E+11 | kg   |
| Sodium hypochlorite (P) | Sodium hypochlorite, without water, in 15% solution state {RER}  market for sodium hypochlorite, without water, in 15% solution state   APOS, U | 700000      | kg   |
| Silica (H)              | Sand, quartz                                                                                                                                    | 5676        | kg   |

**Table 17. Inventory related to substances for Abatement unit during electricity and heating production (Operation)**

| O&M-emissions | Ecoinvent 3.6 | Amount | Unit |
|---------------|---------------|--------|------|
|---------------|---------------|--------|------|



|                          |                  |           |    |
|--------------------------|------------------|-----------|----|
| CO <sub>2</sub> emitted  | Carbon dioxide   | 974726262 | kg |
| H <sub>2</sub> S emitted | Hydrogen sulfide | 131642850 | kg |

**Table 18. Inventory related to machinery component replacement for electricity (Maintenance)**

| O&M-Machinery replacement | Ecoinvent 3.6                                                                            | Amount | Unit |
|---------------------------|------------------------------------------------------------------------------------------|--------|------|
| Steel                     | Steel, low-alloyed {GLO}  market for   APOS, U                                           | 819464 | kg   |
| Stainless steel           | Steel, chromium steel 18/8 {GLO}  market for   APOS, U                                   | 192163 | kg   |
| Aluminium                 | Aluminium, cast alloy {GLO}  market for   APOS, U                                        | 23180  | kg   |
| Copper                    | Copper {GLO}  market for   APOS, U                                                       | 34269  | kg   |
| Titanium                  | Titanium dioxide {RER}  market for   APOS, U                                             | 42269  | kg   |
| Mineral wool              | Stone wool {GLO}  market for stone wool   APOS, U                                        | 23998  | kg   |
| Plastic                   | Polyethylene, high density, granulate {GLO}  market for   APOS, U                        | 818    | kg   |
| GRP                       | Glass fibre reinforced plastic, polyamide, injection moulded {GLO}  market for   APOS, U | 194708 | kg   |
| Transformer oil           | Lubricating oil {RER}  market for lubricating oil   APOS, U                              | 62085  | kg   |

**Table 19. Inventory related to machinery component replacement for heating (Maintenance)**

| O&M-Machinery replacement | Ecoinvent 3.6                                                     | Amount | Unit |
|---------------------------|-------------------------------------------------------------------|--------|------|
| Steel                     | Steel, low-alloyed {GLO}  market for   APOS, U                    | 7661   | kg   |
| Stainless steel           | Steel, chromium steel 18/8 {GLO}  market for   APOS, U            | 33317  | kg   |
| Aluminium                 | Aluminium, cast alloy {GLO}  market for   APOS, U                 | 279    | kg   |
| Copper                    | Copper {GLO}  market for   APOS, U                                | 239    | kg   |
| Rockwool                  | Stone wool {GLO}  market for stone wool   APOS, U                 | 1397   | kg   |
| Plastic                   | Polyethylene, high density, granulate {GLO}  market for   APOS, U | 44     | kg   |

## LCI FOR THE END-OF-LIFE STAGE OF HELLISHEIDI POWER PLANT

**Table 20. Inventory related to wells closure of the geothermal plant (End-of-Life)**

| O&M-Geothermal fluid | Ecoinvent 3.6                                                       | Amount  | Unit |
|----------------------|---------------------------------------------------------------------|---------|------|
| Diesel               | Diesel {Europe without Switzerland}  market for   APOS, U           | 2146250 | kg   |
| Portland cement      | Cement, Portland {Europe without Switzerland}  market for   APOS, U | 2525000 | kg   |
| Inert                | Unspecified waste, unspecified treatment                            | 505000  | kg   |
